# Supplementary material
Source: PubMed Central journal article supplement (PMC1408675)

Fig 1S

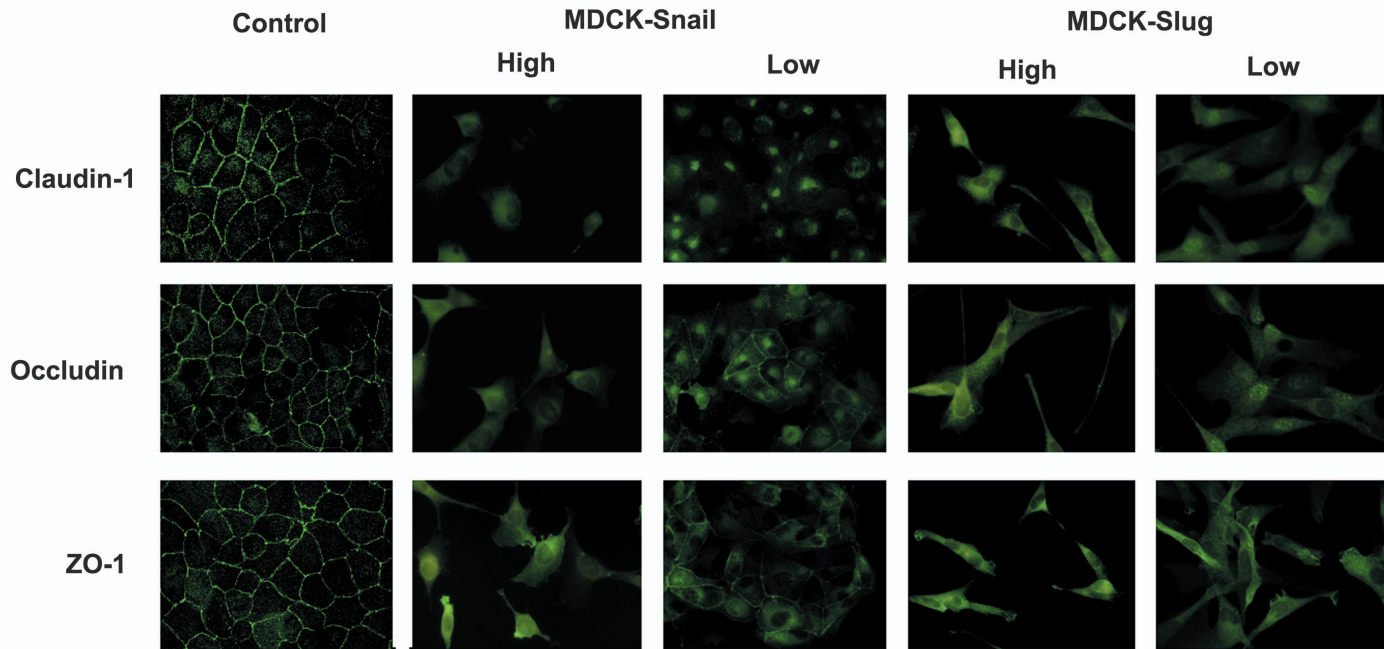

**Fig 2S**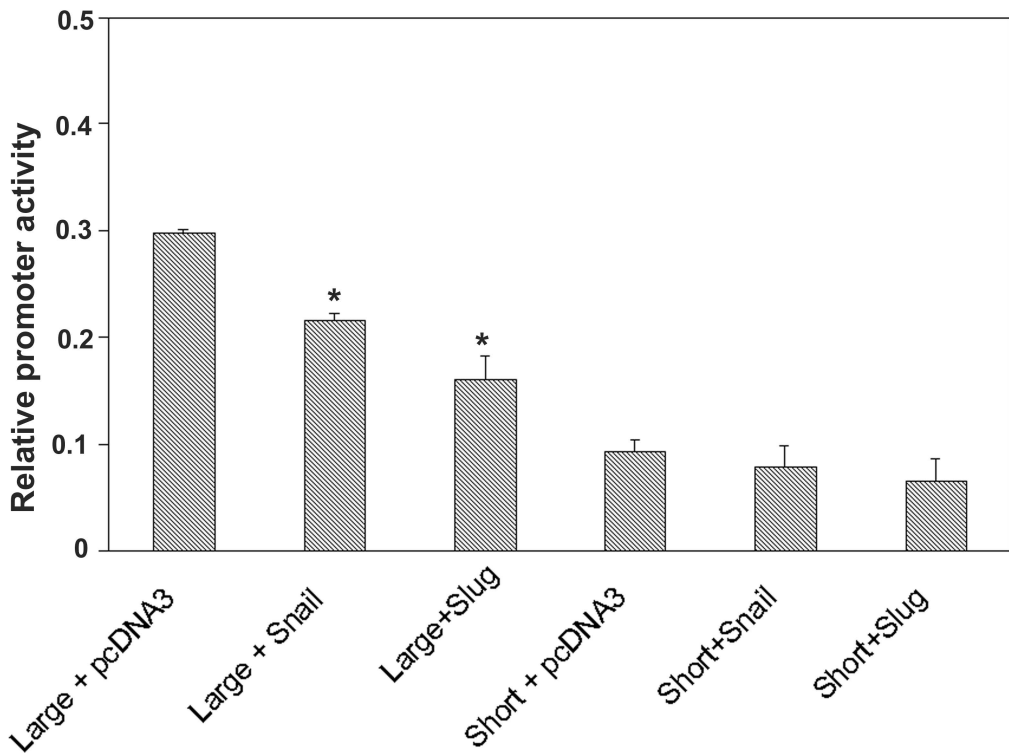**Fig 3S**

| Claudin-1   | Slug        | Snail       |
|-------------|-------------|-------------|
| 75.36 ± 7.5 | 1.46 ± 0.06 | 0.39 ± 0.11 |

Supplement: bj3940449add.pdf [file bj3940449add.pdf]
